# Supplementary material
Source: publisher site journal article supplement (https://www.dovepress.com/article/461674)
Supplement: Supplementary file 1 [file get_supplementary_file.php]

Supplemental Table1. The parental peripheral blood karyotyping results of villous tissue CMA revealedchromosomal structural anomalies

|  | **deletion** | | **duplication** | | **Maternal karyotype** | | **Parental karyotype** | |
| --- | --- | --- | --- | --- | --- | --- | --- | --- |
| case1 | arr[GRCh37] 15q25.3q26.3(87962687_102429040)x1 | | arr[GRCh37] 8q22.1q24.3(98,129,818-146,295,771)x2-3 | | 46,XX,t(8;15)(q22;q25) | | 46,XY | |
| case2 | arr[GRCh37] 1q41q44(219,207,739_249,224,684)x1 | | arr[GRCh37] 10q24.1q26.3(97,179,326_135,426,386)x3 | | 46,XX,t(1;10)(q41;q24) | | 46,XY | |
| case3 | arr[GRCh37] 8p23.3q11.1(158049_46839736)x1 | | arr[GRCh37] 8q11.1q24.3(46863523_146295771)x3 | | 46,XX | | 46,XY,21pstk+ | |
| case4 | arr[GRCh37] 8p23.3p11.21(158,048-42,016,066)x1 | | arr[GRCh37] 8p11.21q24.3(42,020,658-146,295,771)x3 | | 46,xx | | 46,XY | |
| case5 | arr[GRCh37]15q26.1q26.3(92,370,870-102,429,040)x1 | | arr[GRCh37] 16p13.3q24.3(85,880-90,155,062)x3 | | 46,XX | | 46,XY | |
| case6 | arr[GRCh37] 4p16.3p15.1(68,345-34,170,864)x1 | | arr[GRCh37] 2p25.3p16.1(12,770-60,586,820)x3  arr[GRCh37] 4p14q35.2(40,358,861-190,957,460)x3 | | 46,XX | | 46,XY | |
| case7 | arr[GRCh37] 18p11.32p11.21(136,228_15,034,637)x1 | | arr[GRCh37] 18q11.1q23(18,521,285_78,013,728)x2-3 | | 46,XX | | 46,XY | |
| case8 | arr[GRCh37] 18p11.32p11.21(136,227-15,099,116)x1 | | arr[GRCh37] 18q12.1q23(29,069,579-78,013,728)x2-3 | | 46,XX | | 46,XY | |
| case9 | arr[GRCh37] 18p11.32p11.21(136,228_12,946,188)x1 | | arr[GRCh37] 18q11.1q23(18,909,805_78,013,728)x2-3 | | 46,XX | | 46,XY | |
| case10 | | arr[GRCh37] 8p23.3p12(158,049_30,854,338)x1， | | arr[GRCh37]8q22.3q24.3(102,075,462_146,295,771)x2-3 | | 46,XX | | 46,XY |
| case11 | | arr[GRCh37] 8p23.3p11.21(158,048-41,969,930)x1 | | arr[GRCh37] 8q11.1q24.3(46,955,023-146,295,771)x3 | | 46,XX | | N |
| case12 | | arr[GRCh37] 8p23.3p11.21(158,048-42,977,321)x1 | | arr[GRCh37]8q11.21q24.3(49,361,475-146,295,771)x2-3arr[GRCh37]14q32.11q32.33(91,615,890-106,530,460)x3 | | 46,XX | | N |
| case13 | | arr[GRCh37] 16p13.3(85,880-762,940)x1，677kb | | arr[GRCh37] 11p15.5p15.1(230,680-17,555,537)x2-3  arr[GRCh37] 16p13.13p13.11(11,980,616-15,661,757)x3 | | 46,XX | | N |
| case14 | | arr[GRCh37] 4p16.3p16.1(68,345-9,785,515)x1 | | arr[GRCh37] 2p25.3p11.2(12,770-85,673,937)x2-3 | | 46,XX | | N |
| case15 | | arr[GRCh37] Xp22.33p11.23(168,552-48,345,176)x1 | | arr[GRCh37] 8q22.1q24.3(98,129,818-146,295,771)x2-3 | | N | | N |
| case16 | | arr[GRCh37] 6p25.3p22.2(156,975_25,871,217)x1 | | arr[GRCh37] 4q34.1q35.2(171,956,288_190,957,460)x3 | | N | | N |
| case17 | | arr[GRCh37] 17p13.3(525-2,931,947)x1 | | arr[GRCh37] 5p15.33p13.3(113,576-32,968,285)x3 | | N | | N |
| case18 | | arr[GRCh37] 5p15.33p15.32(113,577_5,511,809)x1 | | arr[GRCh37] 18q21.31q23(54,422,827_78,013,728)x3 | | N | | N |
| case19 | arr[GRCh37]7q35q36.3(143848786_159119707)x1 | | arr[GRCh37] 11q23.3q25(119559580_134937416)x3 | | | N | | N |
| case20 | arr[GRCh37] 1p36.33p36.11(849467_24613134)x1 | | arr[GRCh37] 16p13.3p12.2(85881_23165760)x2-3 | | | N | | N |
| case21 | arr[GRCh37] 5p15.33p14.3(361755_20443658)x1 | | arr[GRCh37] 5p14.3p13.1(20766547_39724561)x2-3  arr[GRCh37] 9p24.3p21.1(208455_32279177)x2-3 | | | N | | N |

Supplemental Table2. Copy number variants of villous tissue and Pathogenic rating

|  | **cnv** | **Pathogenic rating** |
| --- | --- | --- |
| case1 | arr[GRCh37] 5p15.33p13.2(113,577_34,764,574)x1 | P |
| case2 | arr[GRCh37] 5p15.33p15.2(113，577_9,821,723)x1 | P |
| case3 | arr[GRCh37] 5p15.33p15.1(113,576-17,469,738)x1  arr[GRCh37] 17p13.3p12(2,944,083-12,163,132)x3 | P  LP |
| case4 | arr[GRCh37] 5p15.33p15.1(113,576-17,469,738)x1  arr[GRCh37] 5p14.1(25,329,529-28,593,684)x3 | P  VOUS |
| case5 | arr[GRCh37] 22q11.21(18648856_21800471)x1 | P |
| case6 | arr[GRCh37] 22q11.21(18919478_21800471)x1 | P |
| case7 | arr[GRCh37] 22q11.21(18,919,477-21,800,471)x1 | P |
| case8 | arr[GRCh37] 22q11.21(18,970,562_21,973,259)x1 | P |
| case9 | arr[GRCh37] 1q32.2q44(209,834,864-249,224,684)x1 | P |
| case10 | arr[GRCh37] 3q26.32q27.3(177,088,485-186,770,050)x1 | P |
| case11 | arr[GRCh37] 3p11.2q12.2(87803836_100716046)x3 | P |
| case12 | arr[GRCh37] 4p16.3p15.31(68,345_19,203,128)x3 | P |
| case13 | arr[GRCh37] 6q26q27(164,386,466-170,914,297)x1 | P |
| case14 | arr[GRCh37] 7q36.1q36.3(148,907,527-159,119,707)x1 | P |
| case15 | arr[GRCh37] 8p23.3p21.1(158,048-28,552,599)x1 | P |
| case16 | arr[GRCh37]9p13.1p24.2(1-38,852,372)x3 | P |
| case17 | arr[GRCh37] 13q14.2q34(50381135_115107733)x2-3 | P |
| case18 | arr[GRCh37] 13q22.3q34(77,574,145-115,107,733)x1  arr[GRCh37] 11p11.12q11(51,268,155-55,036,459)x1 | P  VOUA |
| case19 | arr[GRCh37] 15q26.1q26.3(93949431_102429040)x1 | P |
| case20 | arr[GRCh37] 18q21.1q23(47,029,193-78,013,728)x1  arr[GRCh37] 18p11.32p11.31(1,489,009-3,302,624)x1 | P  VOUS |
| case21 | arr[GRCh37] 18q21.31q23(54297366_78013728)x1 | P |
| case22 | arr[GRCh37] 18p11.32p11.21(82,622 - 15,202,342)x1 | P |
| case23 | arr[GRCh37]20p12.2p12.1(11510559_15223662)x1 | P |
| case24 | arr[GRCh37] 18q21.31q23(54,422,827_78,013,728)x3 | VOUS |
